# Supplementary material for: Impact of Insulin Degludec in Type 2 Diabetes: Real-World Data on Effectiveness and Safety
Source: Springer Nature journal article supplement (doi:10.1007/s13300-018-0511-4), 2018-09-21
Supplement: MOESM1 [file 16143276]

**Supplementary figure 1:** Trends over time in continuous end-points: results of hierarchical linear models.
